# Supplementary material for: Immobilizing AgPd alloy on Vulcan XC-72 carbon: a novel catalyst for highly efficient hydrogen generation from formaldehyde aqueous solution
Source: Royal Society of Chemistry journal article supplement (doi:10.1039/c6ra22761a), 2016-01-01
Supplement: c6ra22761a1.pdf [file c6ra22761a1.pdf]

**Immobilizing AgPd Alloy on Vulcan XC-72 carbon: a novel  
catalyst for highly efficient hydrogen generation from  
formaldehyde aqueous solution**

Shutao Gao, Tao Feng, Qiuhua Wu, Cheng Feng, Ningzhao Shang,  
Chun Wang

College of Science, Agricultural University of Hebei, Baoding 071001,  
China

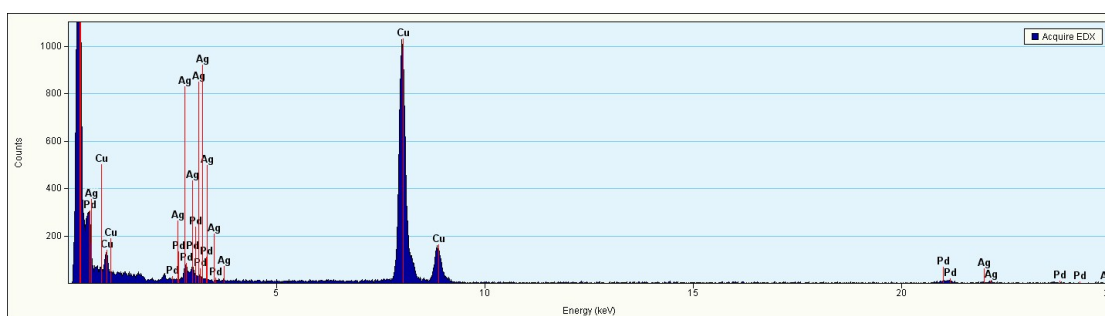

**Figure S1** Energy-dispersive X-ray spectroscopy of the  $\text{Ag}_1\text{Pd}_4@C-72$ .

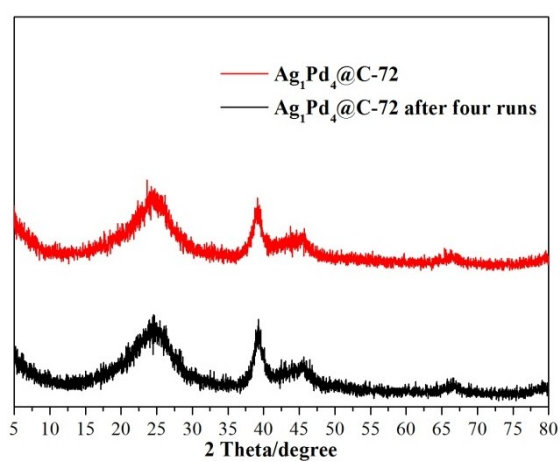

**Figure S2** Powder X-ray diffraction patterns for  $\text{Ag}_1\text{Pd}_4@C-72$  and after four runs.

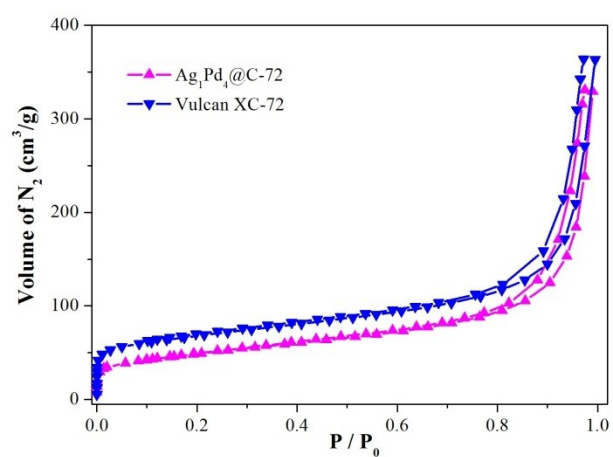

**Figure S3**  $\text{N}_2$  adsorption-desorption isotherms of  $\text{Ag}_1\text{Pd}_4@C-72$  and Vulcan XC-72.

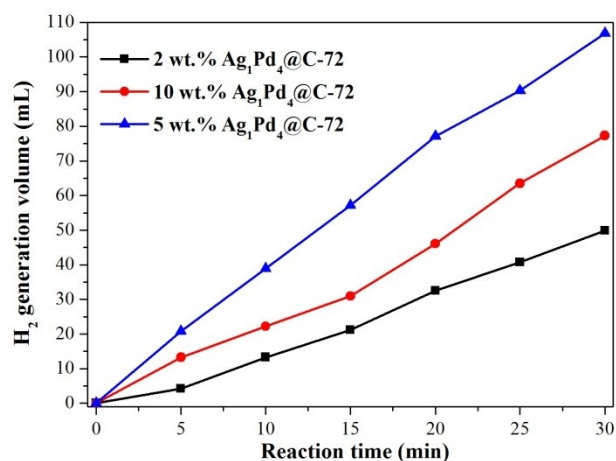

**Figure S4** Hydrogen generation by decomposition of HCHO with different content of AgPd supported on Vulcan XC-72 versus time at 30 °C, NaOH: 1.0 mol/L, HCHO: 0.26 mol/L, catalyst: 15 mg.

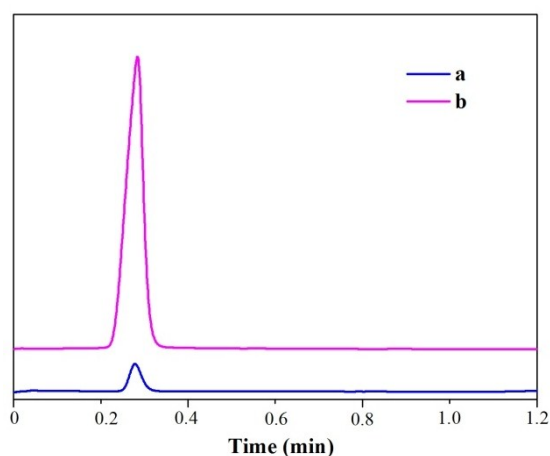

**Figure S5** GC spectrum of the (a) evolved H<sub>2</sub> from alkaline formaldehyde solution at 30 °C over Ag<sub>1</sub>Pd<sub>4</sub>@C-72 catalysts and (b) commercial pure H<sub>2</sub>.

**Table S1** ICP-AES results of AgPd@C-72 catalysts

| catalyst                              | Ag (wt%) | Pd (wt%) | Ag-Pd initial composition | Ag-Pd final composition |
|---------------------------------------|----------|----------|---------------------------|-------------------------|
| Ag <sub>1</sub> Pd <sub>4</sub> @C-72 | 1.08     | 4.12     | 1:4                       | 1:3.90                  |
| Ag <sub>1</sub> Pd <sub>1</sub> @C-72 | 2.54     | 2.81     | 1:1                       | 1:1.08                  |
| Ag@C-72                               | 5.37     | 0        | 5:0                       | 4.97:0                  |
| Pd@C-72                               | 0        | 5.57     | 0:5                       | 0:5.21                  |
